# Supplementary material for: Decreased expression of CHIP leads to increased angiogenesis via VEGF-VEGFR2 pathway and poor prognosis in human renal cell carcinoma
Source: PubMed Central journal article supplement (PMC4448523; doi:10.1038/srep09774), 2015-05-29

**Decreased expression of CHIP leads to increased angiogenesis via VEGF-VEGFR2 pathway and poor prognosis in human renal cell carcinoma**

Chao Sun<sup>1, 2, 4, \*</sup>, Hai-long Li<sup>1, 2, \*</sup>, Hai-rong Chen<sup>6, \*</sup>, Mei-lin Shi<sup>2</sup>, Qing-hua Liu<sup>2, 3</sup>, Zhen-qiang Pan<sup>2, 5</sup>, Jin Bai<sup>2, 5</sup>, Jun-nian Zheng<sup>1, 2</sup>

**1** The First Clinical Medical College, Nanjing Medical University, Nanjing, 210029, China; **2** Jiangsu Key Laboratory of Biological Cancer Therapy, Xuzhou Medical College, Xuzhou, 221002, China; **3** School of Pathology, Xuzhou Medical College, Xuzhou, 221002, China; **4** Department of Urology, The Third the People's Hospital of Bengbu, Bengbu, 233000, China; **5** Department of Oncological Sciences, Icahn School of Medicine at Mount Sinai, New York, 10029, NY, USA; **6** Department of Occupational Medicine and Environmental Health, School of Public Health, Nanjing Medical University, Nanjing, 210029, China.

Correspondence to: Jun-nian Zheng, E-mail: jnzheng@xzmc.edu.cn

\*These authors contributed equally to this paper.

Supplementary Table S1: Univariate Cox proportional regression analysis on 5-year overall and disease-specific survival of 304 renal cancer patients.

| Variable *                        | Overall survival |                     |            | Disease-specific survival |                     |            |
|-----------------------------------|------------------|---------------------|------------|---------------------------|---------------------|------------|
|                                   | Hazard ratio     | 95% CI <sup>†</sup> | <i>P</i> * | Hazard ratio              | 95% CI <sup>†</sup> | <i>P</i> * |
| CHIP                              |                  |                     |            |                           |                     |            |
| Negative                          | 1.000            |                     | 0.032      | 1.000                     |                     | 0.033      |
| positive                          | 0.738            | 0.559-0.974         |            | 0.722                     | 0.536-0.974         |            |
| Age                               |                  |                     |            |                           |                     |            |
| ≤56 years                         | 1.000            |                     | 0.486      | 1.000                     |                     | 0.619      |
| >56 years                         | 1.103            | 0.836-1.455         |            | 1.079                     | 0.800-1.453         |            |
| Tumor size                        |                  |                     |            |                           |                     |            |
| ≤7 cm                             | 1.000            |                     | 0.011      | 1.000                     |                     | 0.010      |
| >7 cm                             | 1.422            | 1.014-1.994         |            | 2.040                     | 1.793-2.764         |            |
| pT status                         |                  |                     |            |                           |                     |            |
| pT <sub>1</sub>                   | 1.000            |                     | 0.010      | 1.000                     |                     | 0.009      |
| pT <sub>2</sub> - pT <sub>4</sub> | 1.462            | 1.095-1.952         |            | 2.299                     | 1.943-2.790         |            |
| pN status                         |                  |                     |            |                           |                     |            |
| pN <sub>0</sub>                   | 1.000            |                     | 0.006      | 1.000                     |                     | 0.004      |
| pN <sub>1</sub> - pN <sub>3</sub> | 2.413            | 1.544-3.080         |            | 2.445                     | 2.020-3.036         |            |
| TNM stage                         |                  |                     |            |                           |                     |            |
| I                                 | 1.000            |                     | 0.009      | 1.000                     |                     | 0.008      |
| II-IV                             | 1.497            | 1.106-2.026         |            | 1.933                     | 1.369-2.628         |            |

\* *P* values are from Log-rank test.

<sup>†</sup> CI: confidence interval.

Supplementary Table S2: Multivariate Cox regression analysis on 5-year overall and disease-specific survival of 304 renal cancer patients.

| Variable*  | Overall survival |                     |          | Disease-specific survival |                |          |
|------------|------------------|---------------------|----------|---------------------------|----------------|----------|
|            | Hazard ratio     | 95% CI <sup>†</sup> | <i>P</i> | Hazard ratio              | 95% CI         | <i>P</i> |
| CHIP       | 0.739            | 0.595 to 1.074      | 0.021    | 0.706                     | 0.560 to 0.947 | 0.024    |
| Age        | 1.021            | 0.762 to 1.369      | 0.890    | 1.005                     | 0.736 to 1.372 | 0.975    |
| Tumor size | 1.809            | 1.369 to 2.725      | 0.012    | 1.815                     | 0.911 to 2.807 | 0.014    |
| TNM stage  | 1.659            | 0.996 to 2.138      | 0.019    | 1.698                     | 1.344 to 1.934 | 0.023    |

\*Coding of variables: CHIP was coded as 1 (negative), and 2 (positive). Age was coded as 1 ( $\leq 56$  years), and 2 ( $> 56$  years). Tumor size was coded as 1 ( $\leq 7$  cm), and 2 ( $> 7$  cm). TNM stage was coded as 1 (I), and 2 (II - IV).

<sup>†</sup> CI: confidence interval.

Revised Supplementary Fig. S3: CHIP levels did not affect the expression of MMP-2 and MMP-9. A Western blot analysis of the relative protein levels of MMP-2, MMP-9 and Actin after CHIP overexpression or knockdown for both 786-O and OS-RC-2 cell lines. B Gelatin zymography analysis of the enzyme activity of MMP-2 and MMP-9 after CHIP overexpression or knockdown for both 786-O and OS-RC-2 cell lines.

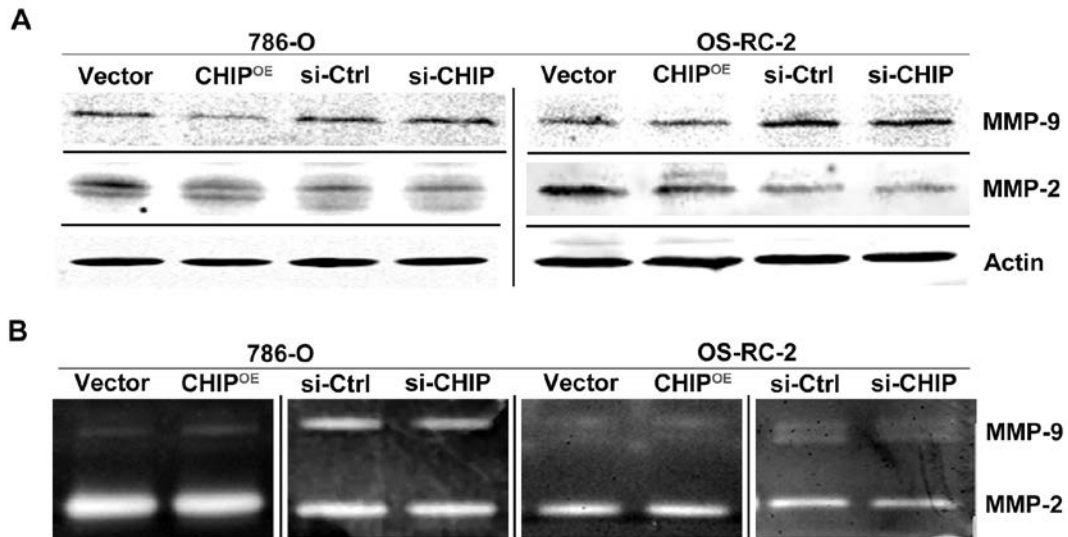

Supplementary Methods S4:

Gelatin zymography: Transfected 786-O and OS-RC-2 cells ( $1 \times 10^6$ ) were cultured in 6-well plate with fresh complete medium for 24 h, and the medium was collected and centrifuged to remove any cell debris before its use as a conditioned medium. 15  $\mu$ g of the proteins was loaded in non-reducing conditions on a 10% polyacrylamide gel containing 0.1% gelatin (Sigma, St. Louis, USA). After electrophoresis, gels were soaked in 2.5% Triton X-100 for 45 minutes with single change of detergent solution. Gels were incubated for 36 h at 37°C in substrate buffer (50 mM Tris-HCl, pH 7.5, 5 mM CaCl<sub>2</sub>, and 0.02% NaN<sub>3</sub>), stained with 0.05% Coomassie brilliant blue G-250 (Sigma, St. Louis, USA), and destained in 10% acetic acid and 20% methanol. Gels were then scanned on the Odyssey Two-Color Infrared Imaging System (LI-COR Biotechnology, Lincoln, Nebraska, USA).

Revised Supplementary Fig. S5: CHIP did not affect the protein expression of HIF-1 $\alpha$ . Western blot analysis of the protein levels of HIF-1 $\alpha$  and Actin after CHIP overexpression or knockdown for both 786-O and OS-RC-2 cell lines.

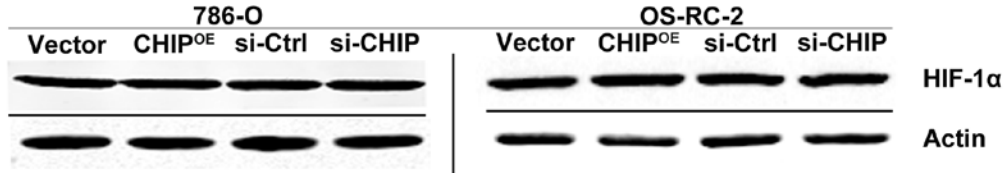

Revised Fig. 3

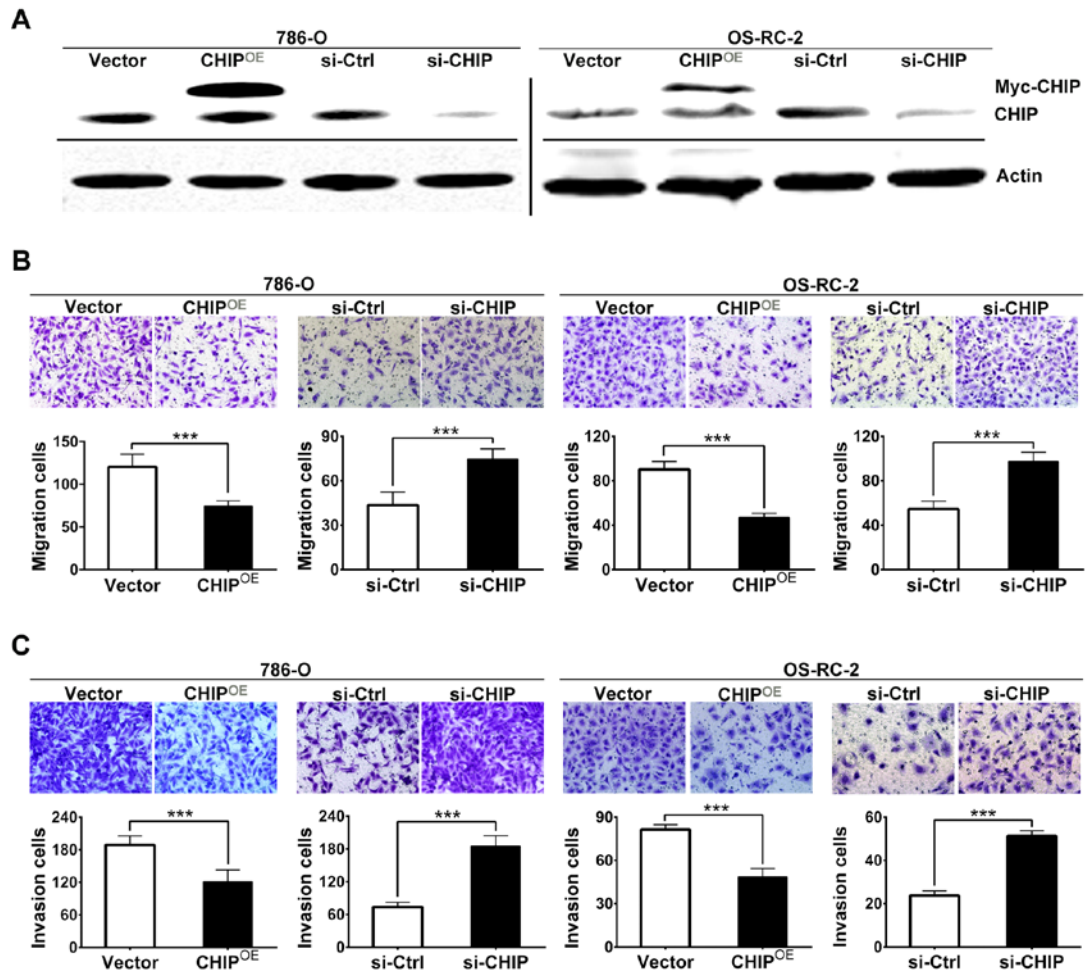

Revised Fig. 5

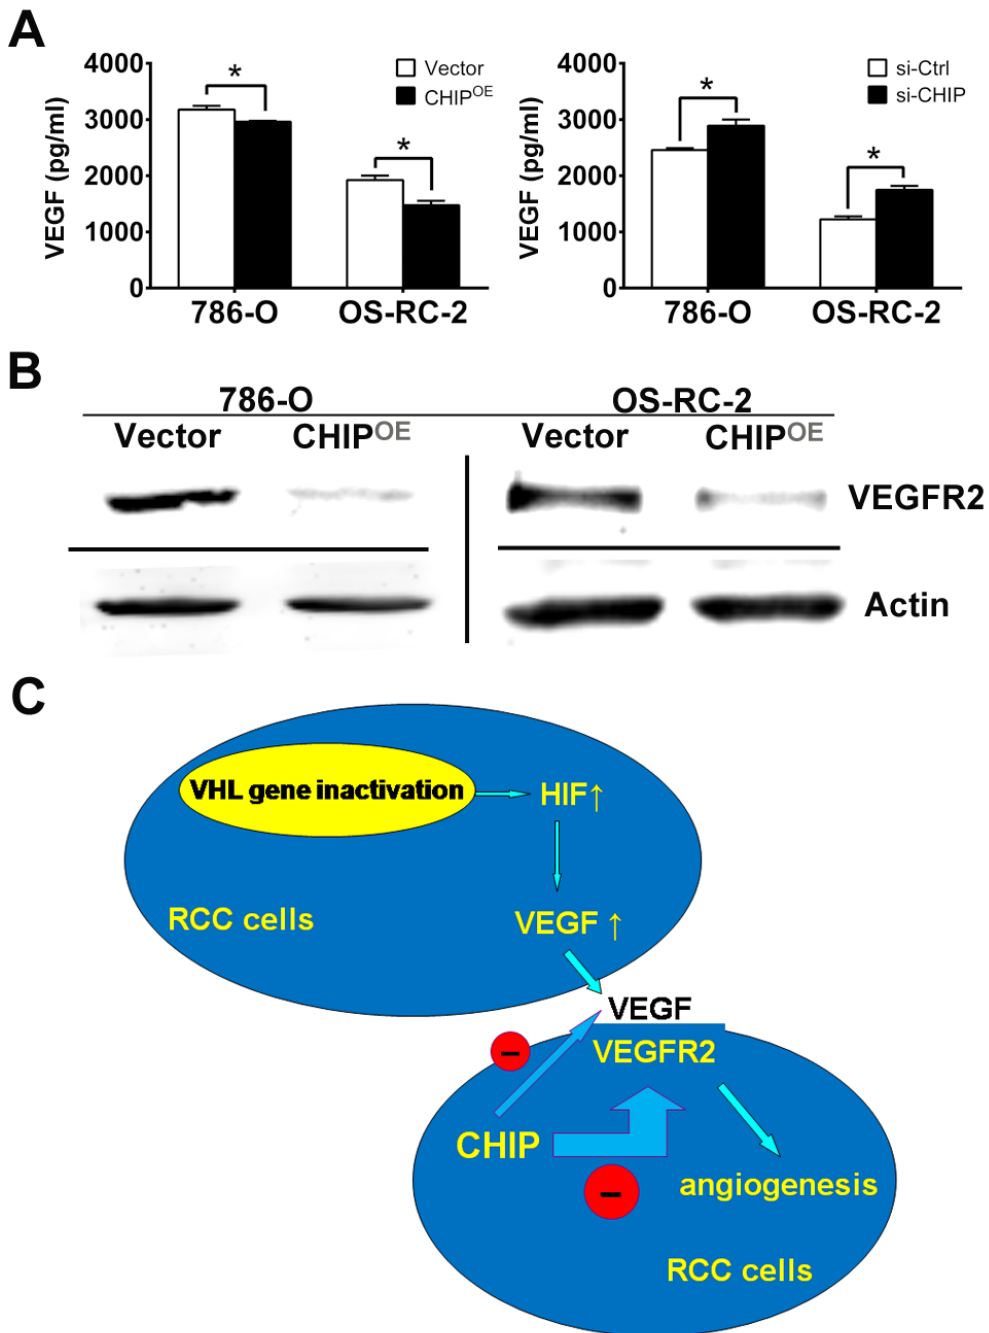

Unprocessed original scans for all of the blots:

All image acquisition tools: Odyssey Two-Color Infrared Imaging System

(LI-COR Biotechnology, Lincoln, Nebraska, USA)

All image processing software packages: Adobe Photoshop CS5.0

Figure 3

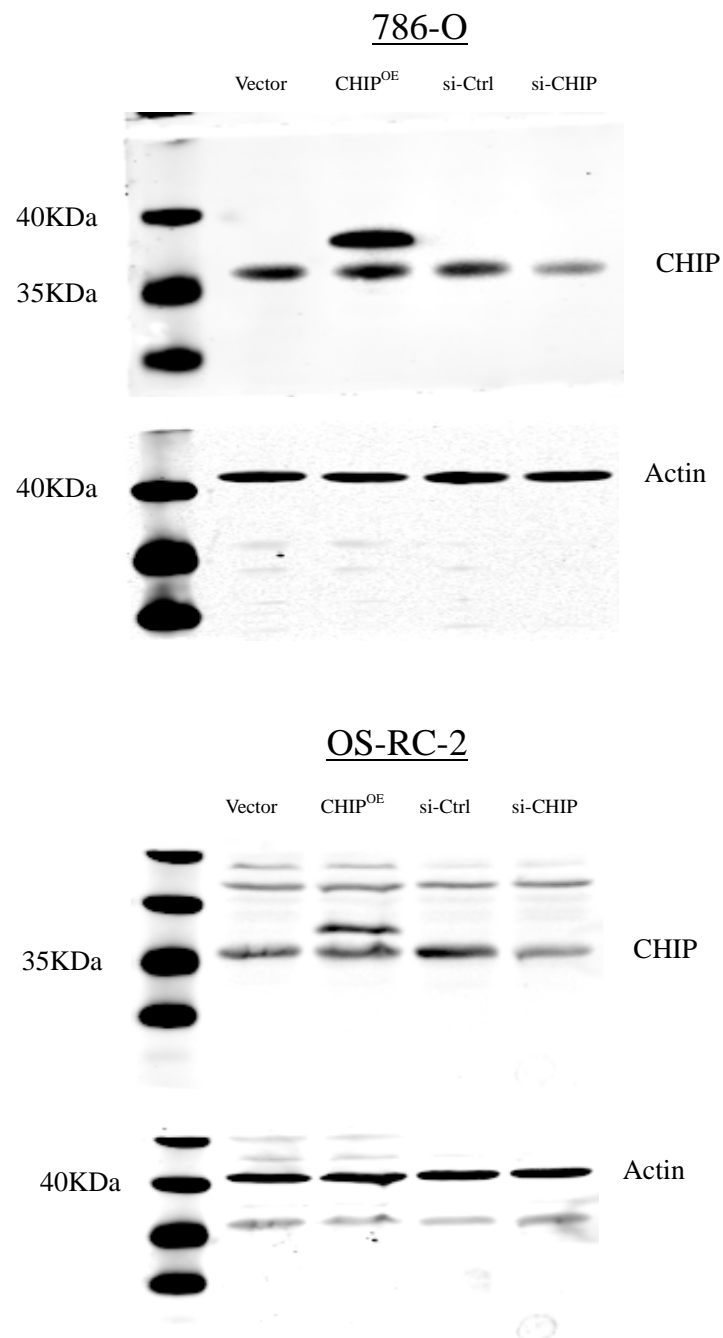

Figure 5

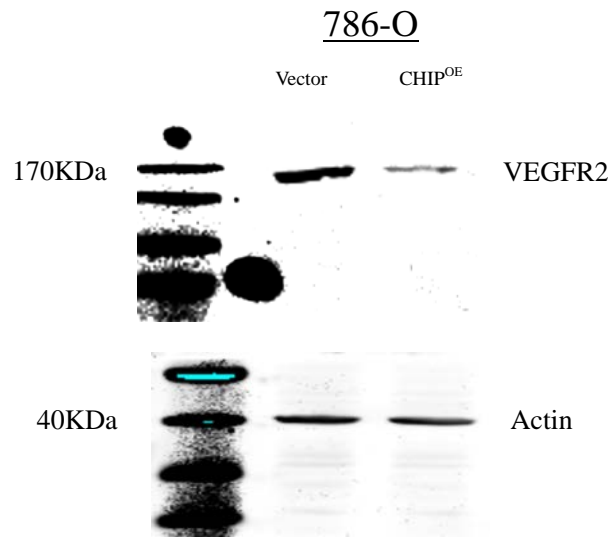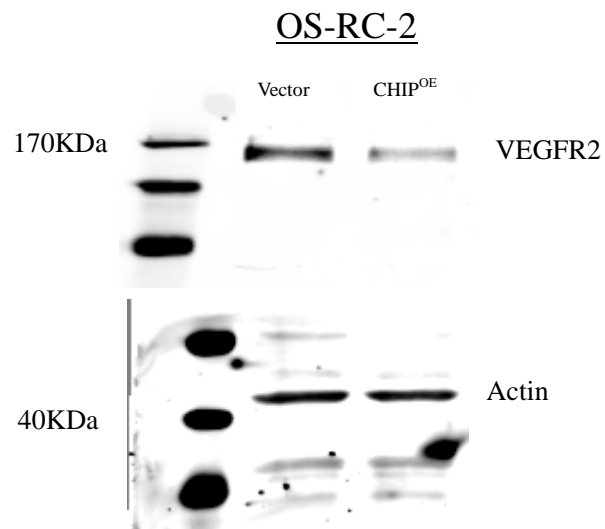



Figure S3

786-O

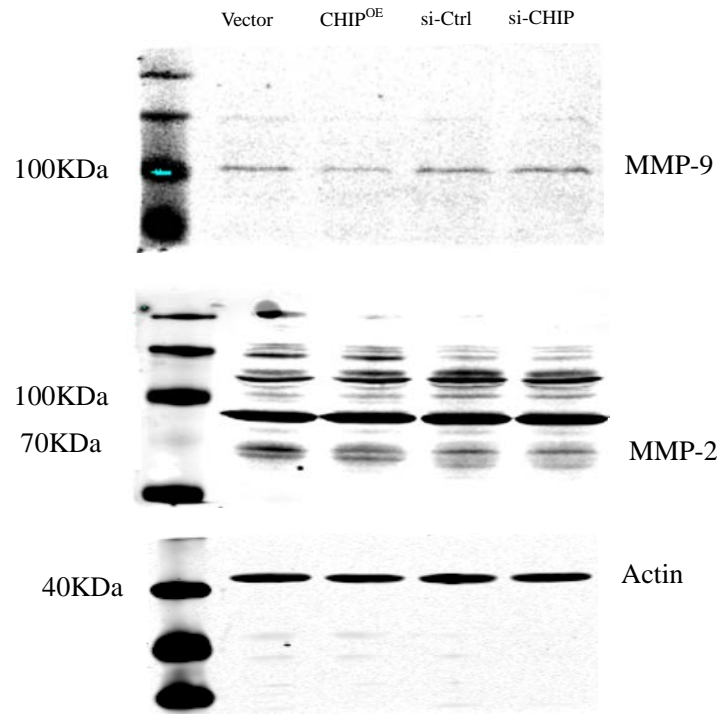

OS-RC-2

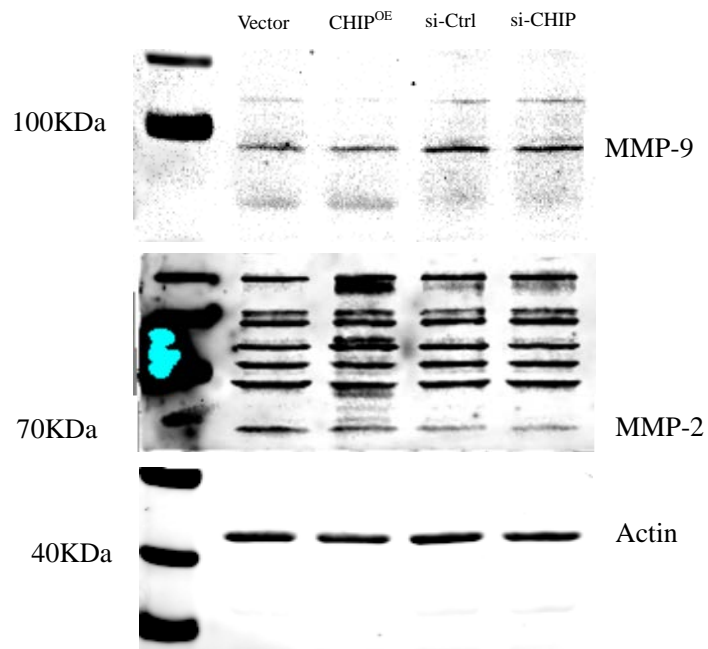

786-O

OS-RC-2

Vector      CHIP<sup>OE</sup>      Vector      CHIP<sup>OE</sup>

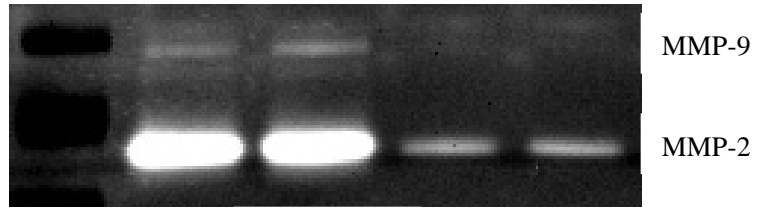

786-O

si-Ctrl      si-CHIP

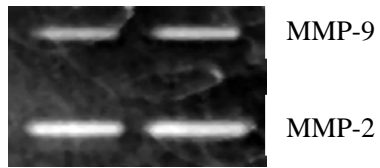

OS-RC-2

si-Ctrl      si-CHIP

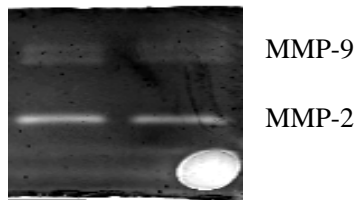

Figure S5

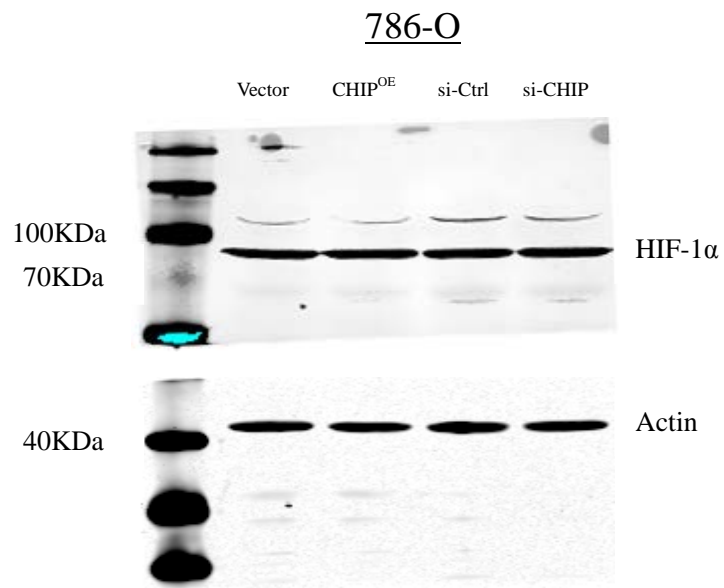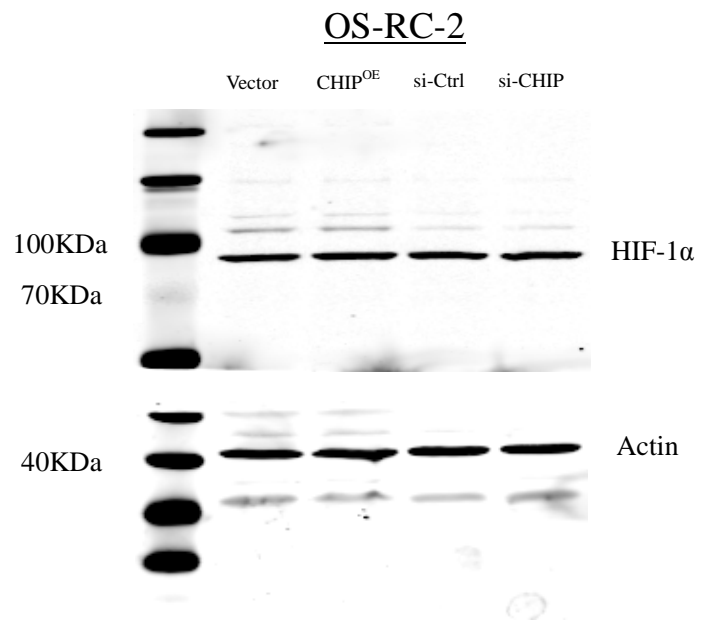

Supplement: srep09774-s1.pdf [file srep09774-s1.pdf]
